# Supplementary material
Source: MDPI journal article supplement (https://www.mdpi.com/1999-4907/9/9/515)
Supplement: s1 [file s1]

# Supplementary Materials: 25 Years of Criteria and Indicators for Sustainable Forest Management - Why Some Processes Flourished While Others Faded

Stefanie Linser <sup>1,2,\*</sup>, Bernhard Wolfslehner <sup>1,2</sup>, Fady Asmar <sup>3</sup>, Simon R. J. Bridge <sup>4</sup>, David Gritten <sup>5</sup>, Vicente Guadalupe <sup>6</sup>, Mostafa Jafari <sup>7</sup>, Steven Johnson <sup>8</sup>, Pablo Laclau <sup>9</sup> and Guy Robertson <sup>10</sup>

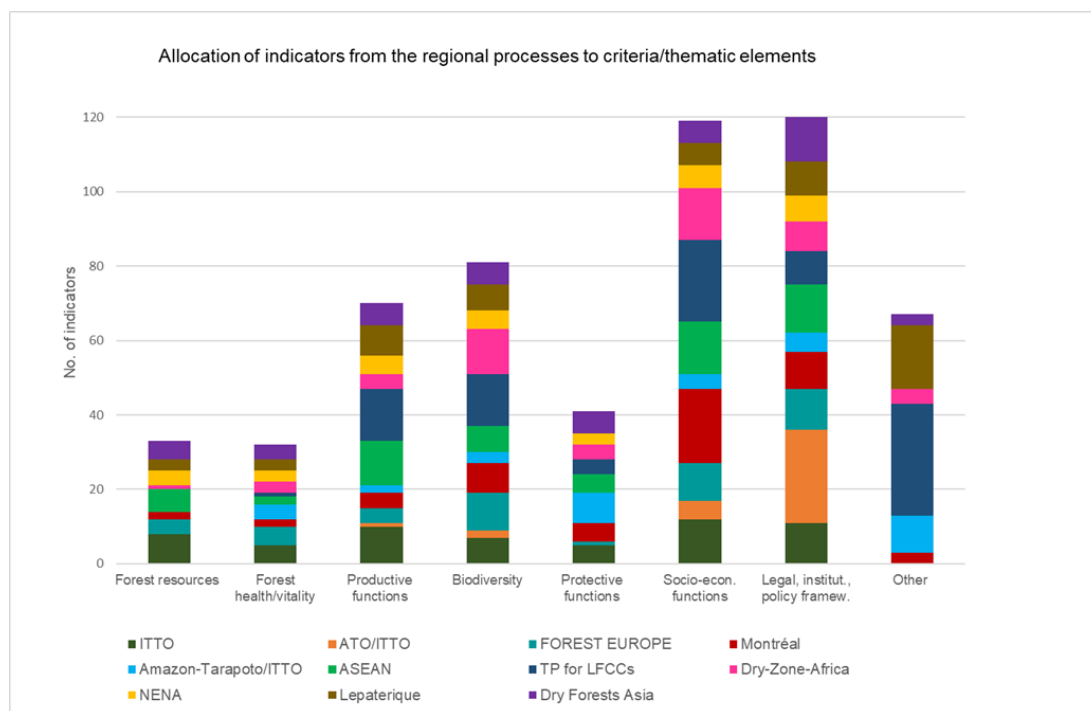

**Figure S1.** Allocation of indicators from the C&I processes to criteria/thematic elements.

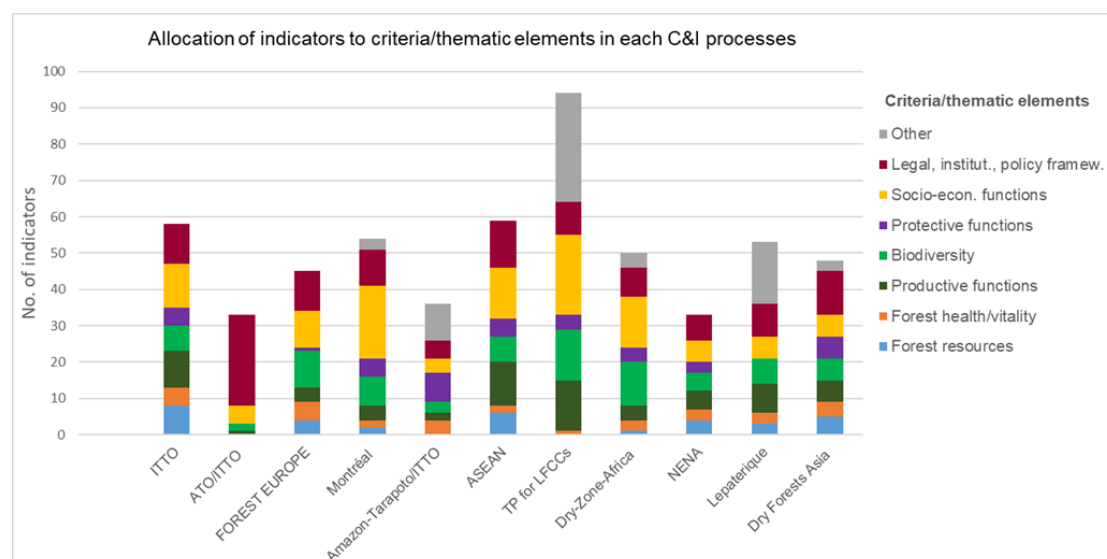

**Figure S2.** Allocation of indicators to criteria/thematic elements in each C&I process.

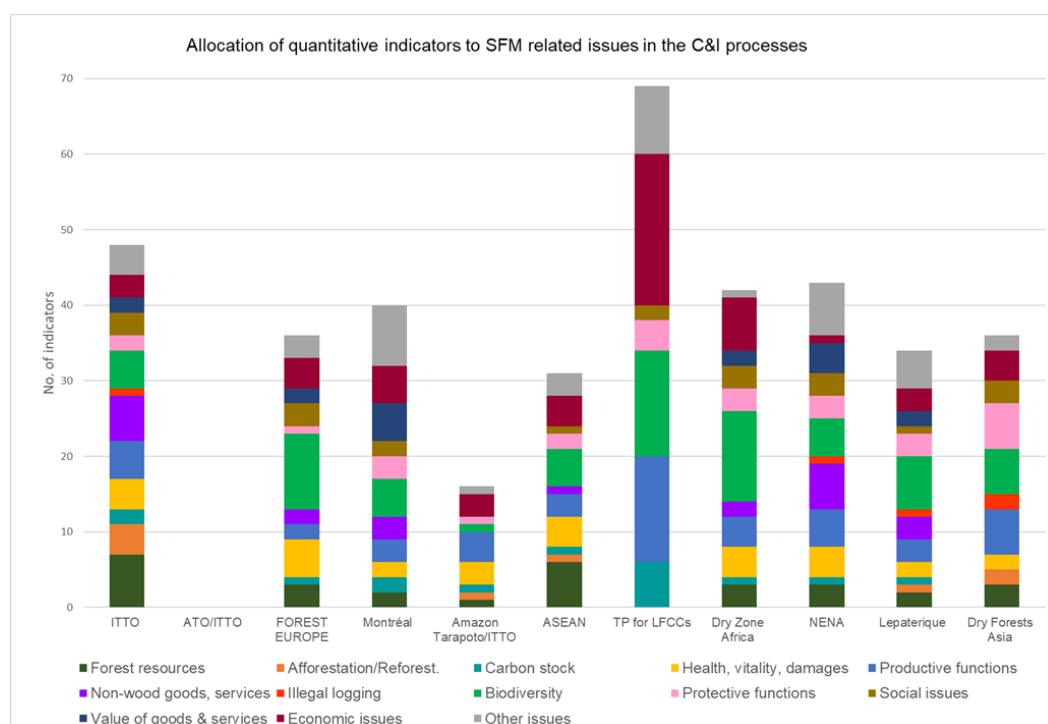

**Figure S3.** Allocation of quantitative indicators to SFM related issues in the C&I processe.

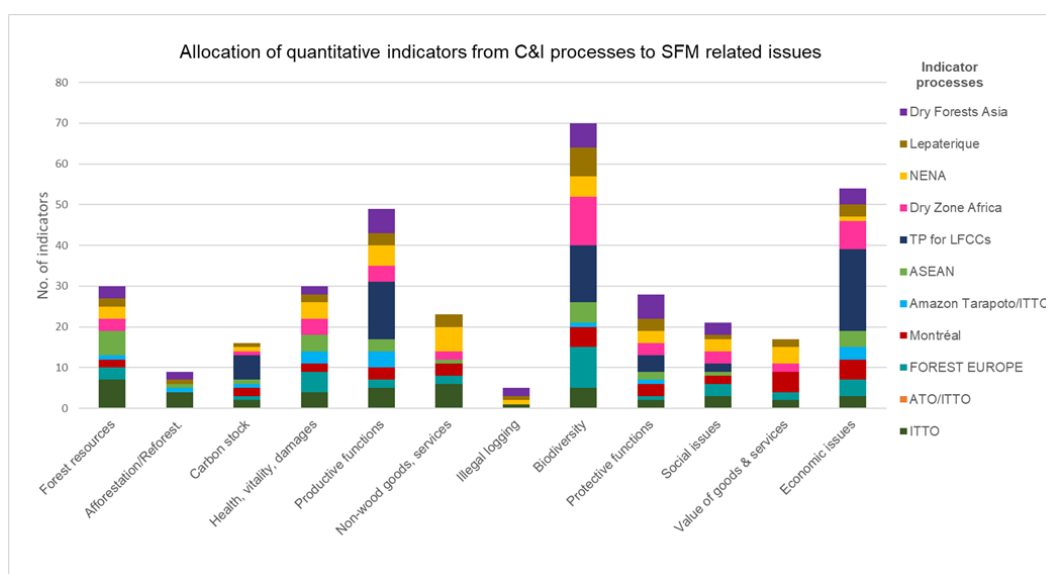

**Figure S4.** Allocation of quantitative indicators from C&I processes to SFM related issues.

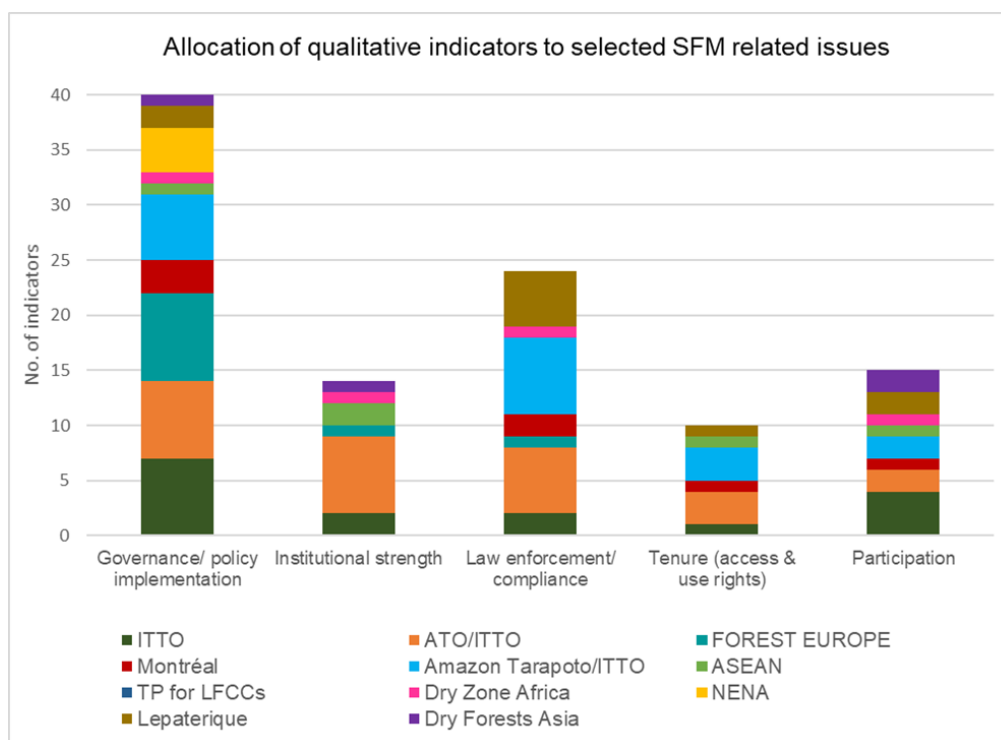

**Figure S5.** Allocation of qualitative indicators to selected SFM related issues.

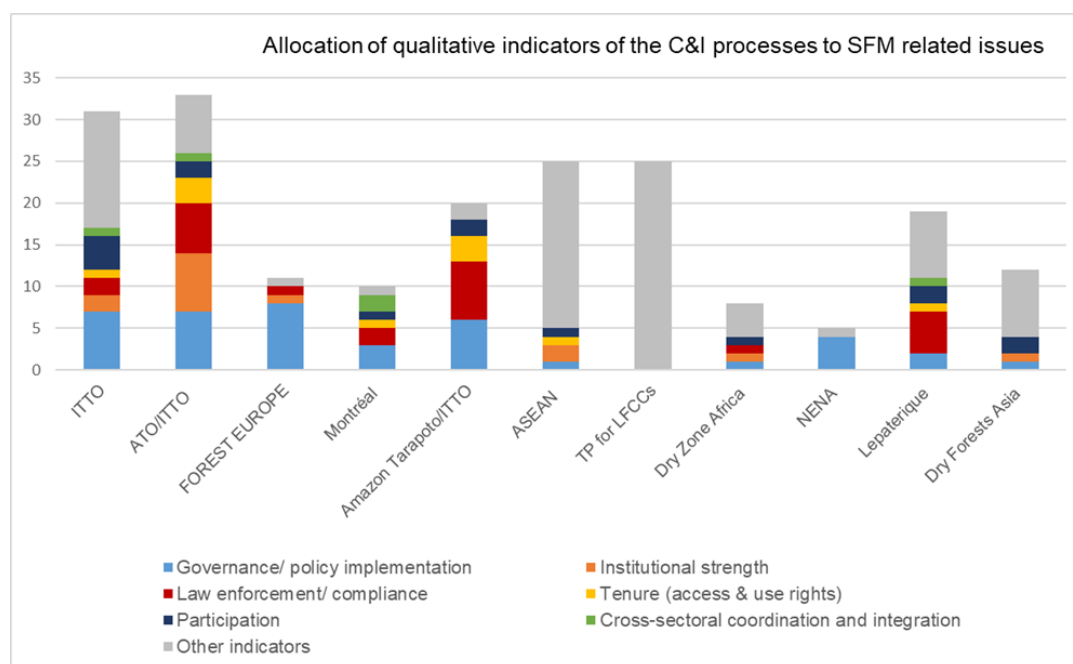

**Figure S6.** Allocation of qualitative indicators of the C&I processes to SFM related issues.
